# Supplementary material for: Detecting and Quantifying Changing Selection Intensities from Time-Sampled Polymorphism Data
Source: Oxford University Press journal article supplement (doi:10.1534/g3.115.023200), 2016-03-07
Supplement: 023200_figures3.pdf [file 023200_figures3.pdf]

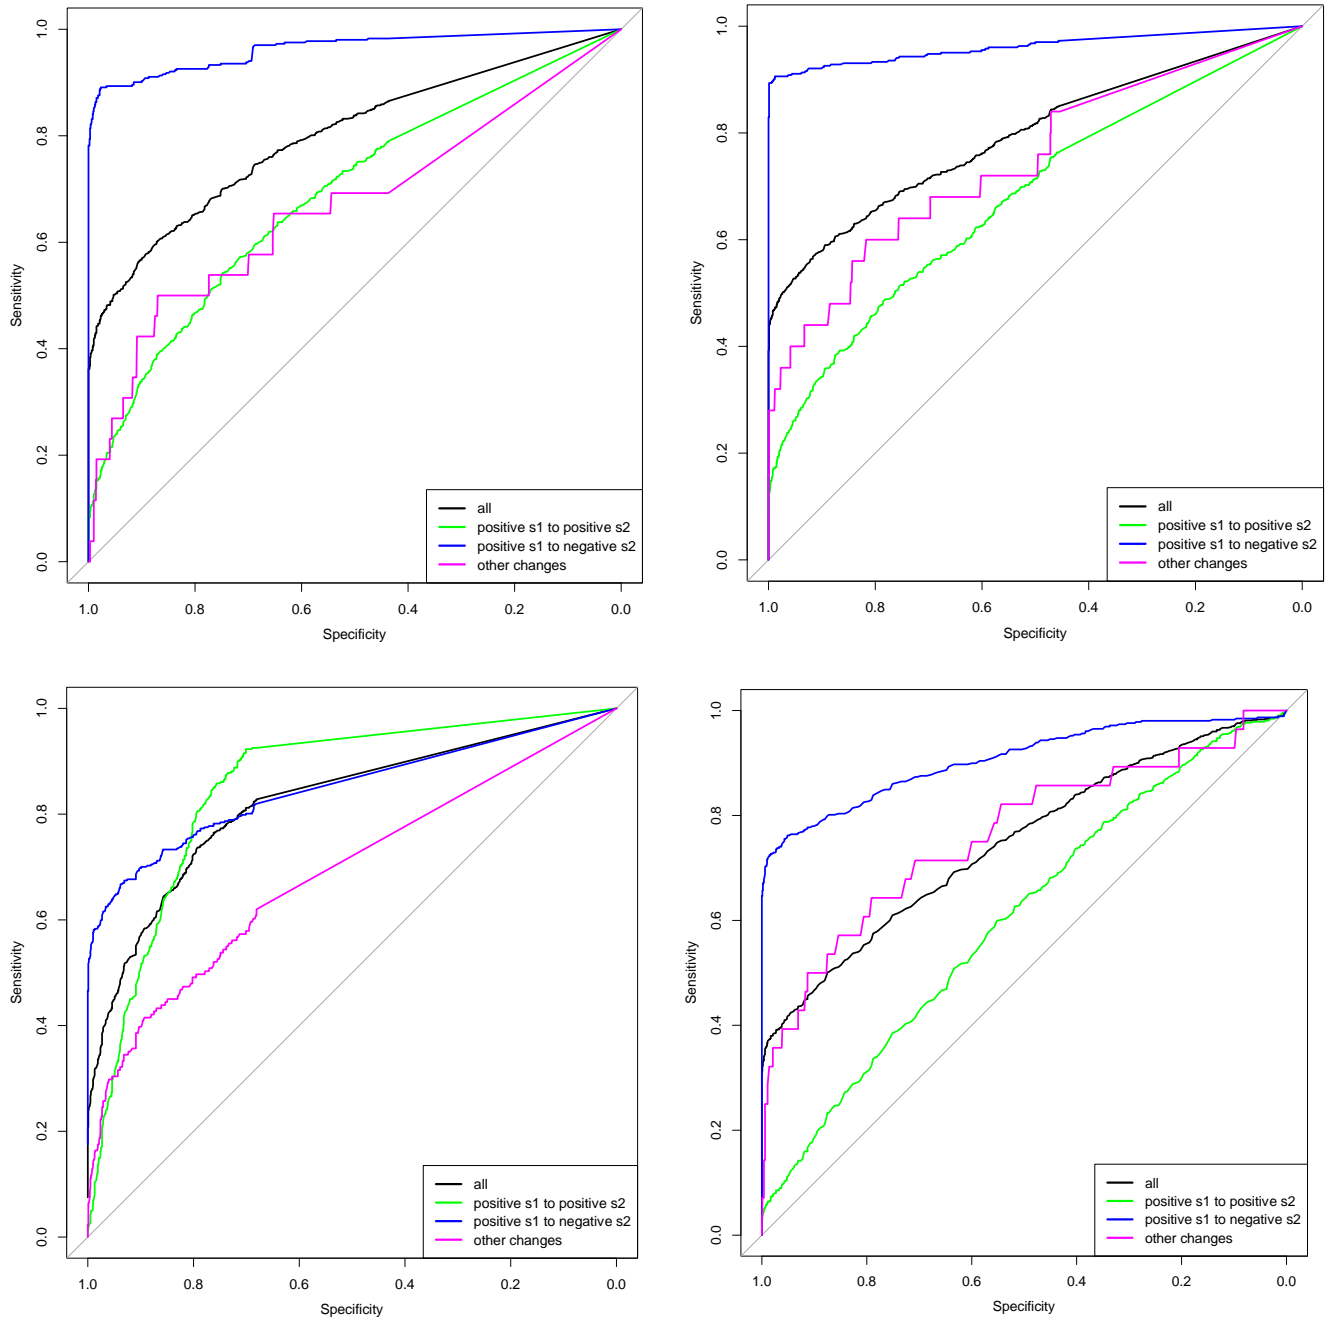

**Figure S3.** ROC curves of the Bayes factor  $B_{0,1}$  from the ABC model choice of a haploid population with  $N_e=[1000,10000]$  (above) and a diploid population with  $N_e=[50,5000]$  (below).
