# Supplementary material for: Detecting and Quantifying Changing Selection Intensities from Time-Sampled Polymorphism Data
Source: Oxford University Press journal article supplement (doi:10.1534/g3.115.023200), 2016-03-07
Supplement: 023200_figures8.pdf [file 023200_figures8.pdf]

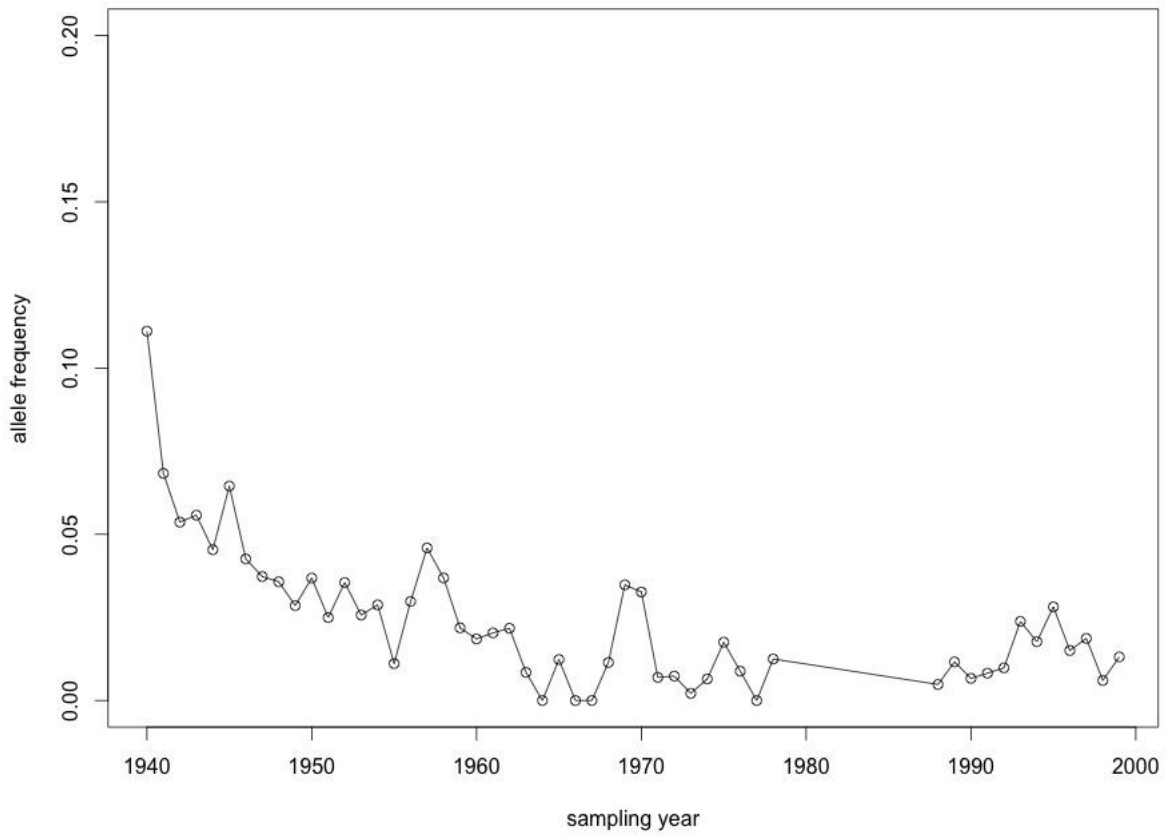

**Figure S8.** Allele frequency of the *medionigra* morph from 1939 to 1999.
