# Supplementary material for: Detecting and Quantifying Changing Selection Intensities from Time-Sampled Polymorphism Data
Source: Oxford University Press journal article supplement (doi:10.1534/g3.115.023200), 2016-03-07

**Figure S9.** Posterior distributions for the *medionigra* morph after the ABC model choice.

$N_e = 500$ :  $s$  estimated from the  $M_0$  model

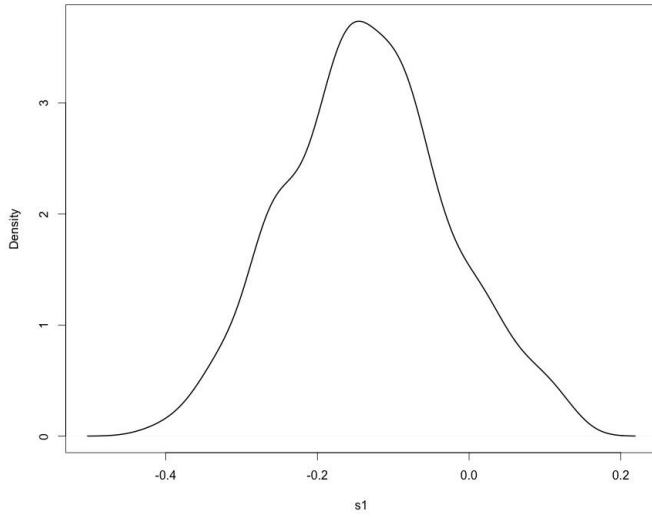

$N_e = 50$ :  $s_1, s_2, CP$  estimated from the  $M_1$  model

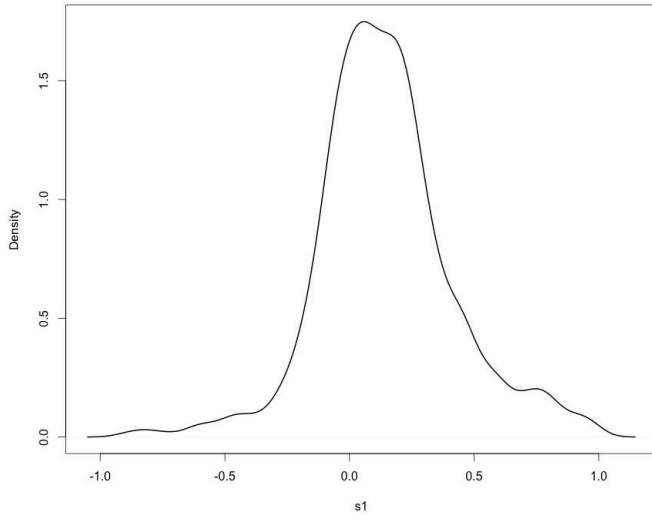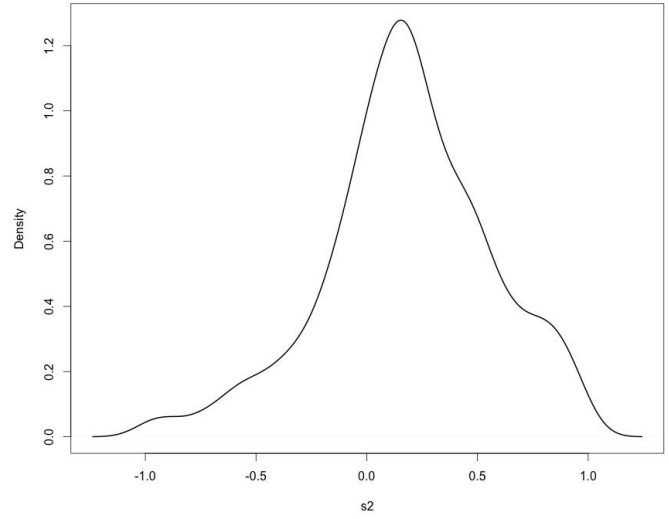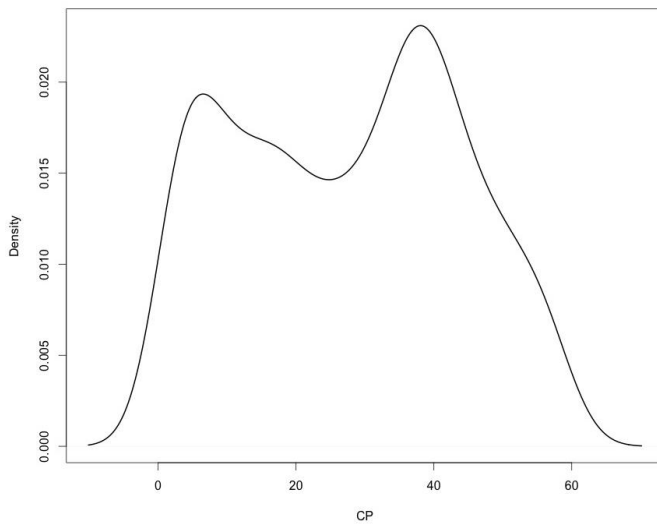

Supplement: 023200_figures9.pdf [file 023200_figures9.pdf]
