# Supplementary material for: Detecting and Quantifying Changing Selection Intensities from Time-Sampled Polymorphism Data
Source: PubMed Central journal article supplement (PMC4825659; doi:10.1534/g3.115.023200), 2016-02-10
Supplement: supp_g3.115.023200_FigureS1.pdf [file supp_g3.115.023200_FigureS1.pdf]

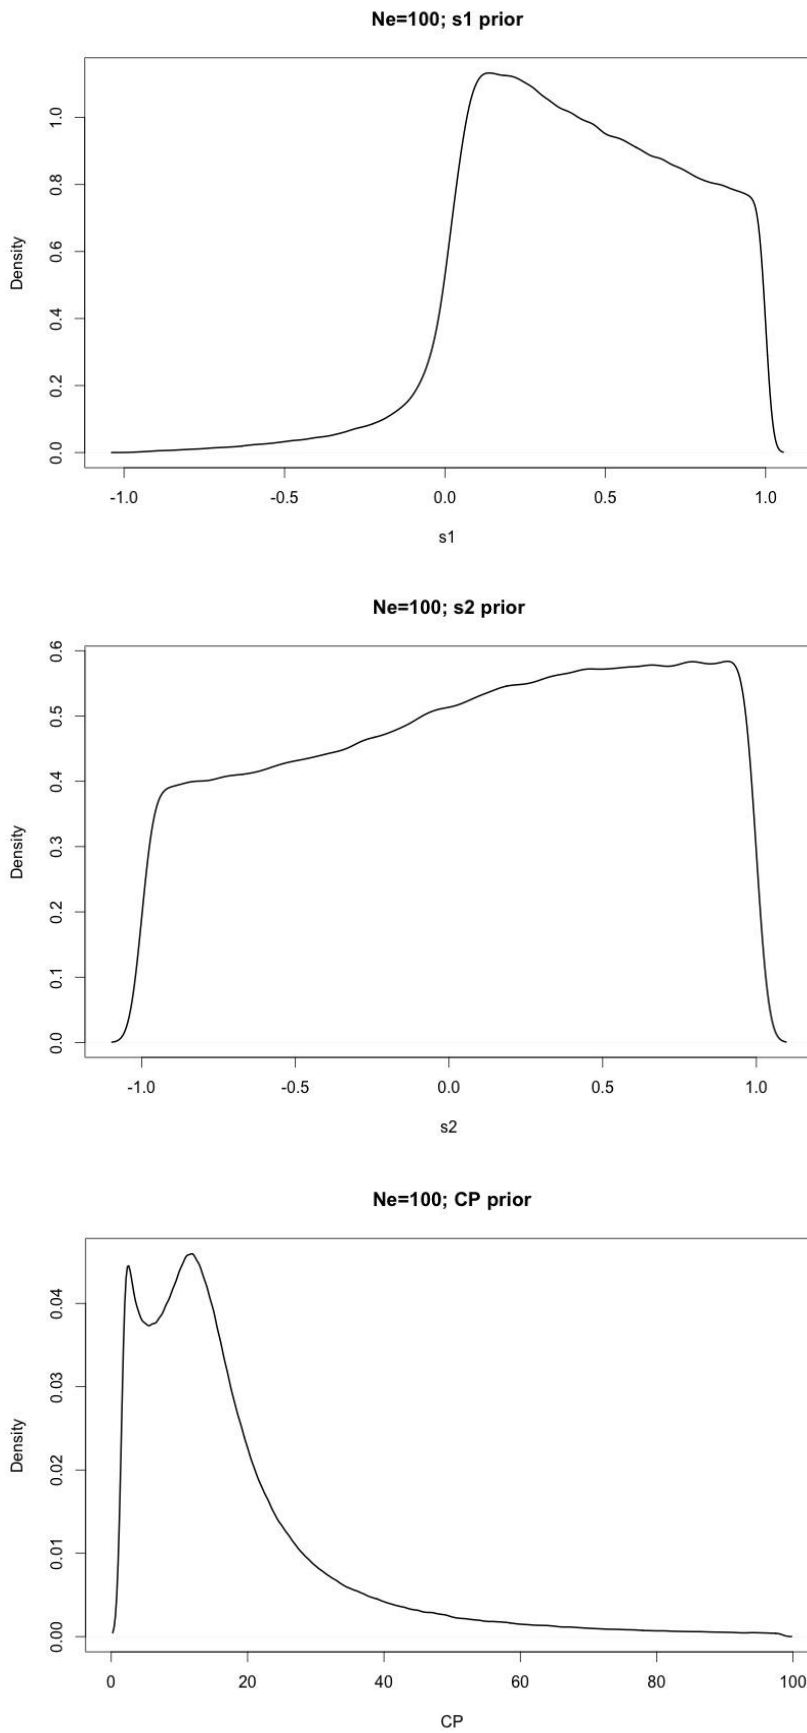

**Figure S1.** Updated prior distributions of  $s1$ ,  $s2$ ,  $CP$  for a haploid population with  $N_e=100$  after the constraint of trajectories segregating at change point.
